# Supplementary material for: Increased risk of chronic kidney disease in uric acid stone formers with high neutrophil-to-lymphocyte ratio
Source: PubMed Central journal article supplement (PMC10582096; doi:10.1038/s41598-023-45034-1), 2023-10-17
Supplement: 41598_2023_45034_MOESM1_ESM.pdf [file 41598_2023_45034_MOESM1_ESM.pdf]

## Title page

# Increased risk of chronic kidney disease in uric acid stone formers with high neutrophil-to-lymphocyte ratio

Hsiu-Ting Tung<sup>1</sup>, Chia-Min Liu<sup>1</sup>, **Ho-Shiang Huang<sup>1</sup>**, Ze-Hong Lu<sup>1, \*</sup>, Chan-Jung Liu<sup>1, \*</sup>

<sup>1</sup>Department of Urology, National Cheng Kung University Hospital, College of Medicine, National Cheng Kung University, Tainan, 704302, Taiwan; [willy830401@gmail.com](mailto:willy830401@gmail.com) (H.-T.T.); [cool2423@gmail.com](mailto:cool2423@gmail.com) (C.-M.L.); [hshuang54@gmail.com](mailto:hshuang54@gmail.com) (H.-S-H); [lthxd@hotmail.com](mailto:lthxd@hotmail.com) (Z.-H.L.); [dragon2043@hotmail.com](mailto:dragon2043@hotmail.com) (C.-J.L.)

\*Correspondence: Ze-Hong Lu ([lthxd@hotmail.com](mailto:lthxd@hotmail.com)); Chan-Jung Liu ([dragon2043@hotmail.com](mailto:dragon2043@hotmail.com))

Address: No. 138, Sheng Li Road, Tainan 704302, Taiwan

TEL: 886.6.2353535 ext.5251 FAX: 886.6. 2766179

|                                         | <b>High NLR (&gt;2.8)<br/>(n=169)</b> | <b>Low NLR (≤2.8)<br/>(n=167)</b> | <b>P-value</b> |
|-----------------------------------------|---------------------------------------|-----------------------------------|----------------|
| <b>NLR</b>                              | 4.58 (3.46-6.88)                      | 1.87 (1.48-2.36)                  |                |
| <b>Age (years)</b>                      | 60.3±14.5                             | 60.2±11.5                         | 0.939          |
| <b>BMI (kg/m<sup>2</sup>)</b>           | 26.4±4.5                              | 26.1±3.9                          | 0.451          |
| <b>Male (%)</b>                         | 129 (76.3%)                           | 112 (67.1%)                       | 0.059          |
| <b>Overweight (%)</b>                   | 100 (59.2%)                           | 98 (58.7%)                        | 0.927          |
| <b>DM (%)</b>                           | 60 (35.5%)                            | 47 (28.1%)                        | 0.148          |
| <b>HTN (%)</b>                          | 79 (46.7%)                            | 78 (46.7%)                        | 0.994          |
| <b>Dyslipidemia (%)</b>                 | 54/86 (62.8%)                         | 43/58 (74.1%)                     | 0.154          |
| <b>CVD (%)</b>                          | 13/131 (9.9%)                         | 14/137 (10.2%)                    | 0.936          |
| <b>Gout (%)</b>                         | 33/131 (25.2%)                        | 16/137 (11.7%)                    | 0.004          |
| <b>Hyperuricemia (%)</b>                | 27/65 (41.5%)                         | 30/73 (41.1%)                     | 0.958          |
| <b>Acidic urine (%)</b>                 | 68 (40.2%)                            | 54 (32.3%)                        | 0.132          |
| <b>eGFR (mL/min/1.73 m<sup>2</sup>)</b> | 75.0±41.1                             | 82.8±38.7                         | 0.073          |
| <b>Serum uric acid (mg/dL)</b>          | 6.8±1.6                               | 6.6±1.9                           | 0.539          |
| <b>Serum CHOL (mg/dL)</b>               | 172.2±41.5                            | 185.4±39.3                        | 0.057          |
| <b>Serum TG (mg/dL)</b>                 | 133.7±65.6                            | 147.0±101.8                       | 0.345          |
| <b>Serum HbA1c (%)</b>                  | 6.7±1.6                               | 6.2±1.2                           | 0.047          |

**Supplementary Table 1.** Clinical characteristics of the stone formers stratified by values below and above the median NLR.

Values are expressed as the number (percent), mean ± standard deviation, or median (interquartile range). BMI: body mass index; DM: type 2 diabetes mellitus; HTN: hypertension; CVD: cardiovascular diseases; CHOL: total cholesterol; TG: triglyceride; HbA1c: Glycated hemoglobin; NLR: neutrophil/lymphocyte ratio.

|                                         | <b>Non-uric acid<br/>(n=169)</b> | <b>Mixed-uric-acid<br/>(n=69)</b> | <b>Pure-uric acid<br/>(n=98)</b> | <b>P-value</b> |
|-----------------------------------------|----------------------------------|-----------------------------------|----------------------------------|----------------|
| <b>Age (years)</b>                      | 56.5±11.7                        | 63.1±11.5                         | 64.7±13.1                        | <0.001         |
| <b>BMI (kg/m<sup>2</sup>)</b>           | 25.8±4.1                         | 26.5±3.9                          | 26.7±4.6                         | 0.222          |
| <b>Male (%)</b>                         | 98 (58.0%)                       | 59 (85.5%)                        | 84 (85.7%)                       | <0.001         |
| <b>Overweight (%)</b>                   | 97 (57.4%)                       | 44 (63.8%)                        | 57 (58.2%)                       | 0.652          |
| <b>DM (%)</b>                           | 47 (27.8%)                       | 21 (30.4%)                        | 39 (39.8%)                       | 0.123          |
| <b>HTN (%)</b>                          | 68 (40.2%)                       | 40 (58.0%)                        | 49 (50.0%)                       | 0.034          |
| <b>Dyslipidemia (%)</b>                 | 45/67 (67.2%)                    | 20/28 (71.4%)                     | 32/49 (65.3%)                    | 0.858          |
| <b>CVD (%)</b>                          | 9/102 (8.8%)                     | 3/68 (4.4%)                       | 15/98 (15.3%)                    | 0.063          |
| <b>Gout (%)</b>                         | 7/102 (6.9%)                     | 14/68 (20.6%)                     | 28/98 (28.6%)                    | <0.001         |
| <b>Hyperuricemia (%)</b>                | 11/42 (26.2%)                    | 16/36 (44.4%)                     | 30/60 (50.0%)                    | 0.050          |
| <b>Acidic urine (%)</b>                 | 37 (21.9%)                       | 34 (49.3%)                        | 51 (52%)                         | <0.001         |
| <b>eGFR (mL/min/1.73 m<sup>2</sup>)</b> | 95.0±41.5                        | 67.1±29.9                         | 59.3±31.6                        | <0.001         |
| <b>Serum uric acid (mg/dL)</b>          | 6.2±1.9                          | 6.9±1.6                           | 7.0±1.7                          | 0.055          |
| <b>Serum CHOL (mg/dL)</b>               | 180.5±40.0                       | 181.3±38.0                        | 177.5±41.0                       | 0.431          |
| <b>Serum TG (mg/dL)</b>                 | 137.2±86.9                       | 139.0±92.4                        | 141.4±68.9                       | 0.965          |
| <b>Serum HbA1c (%)</b>                  | 6.4±1.4                          | 6.2±1.0                           | 6.6±1.6                          | 0.578          |
| <b>NLR</b>                              | 2.54 (1.68-4.27)                 | 2.85 (2.08-4.67)                  | 3.22 (2.18-5.22)                 | 0.012          |

**Supplementary Table 2.** Clinical characteristics of the stone formers stratified by proportion of uric acid in the stone composition.

Values are expressed as the number (percent), mean ± standard deviation, or median (interquartile range). BMI: body mass index; DM: type 2 diabetes mellitus; HTN: hypertension; CVD: cardiovascular diseases; CHOL: total cholesterol; TG: triglyceride; HbA1c: Glycated hemoglobin; NLR: neutrophil/lymphocyte ratio
